# Supplementary material for: Structure and dynamics of lysozyme in DMSO–water binary mixture: fluorescence correlation spectroscopy
Source: Royal Society of Chemistry journal article supplement (doi:10.1039/c4ra00719k), 2014-01-01
Supplement: c4ra00719k1.pdf [file c4ra00719k1.pdf]

Supporting information for

**Structure and Dynamics of Lysozyme in DMSO-Water Binary Mixture:  
Fluorescence Correlation Spectroscopy**

Shirsendu Ghosh, Shyamtanu Chattoraj, Rajdeep Chowdhury and Kankan Bhattacharyya\*

Department of Physical Chemistry, Indian Association for the Cultivation of Science, Jadavpur,  
Kolkata 700032, India

\*E-mail: [pckb@iacs.res.in](mailto:pckb@iacs.res.in)

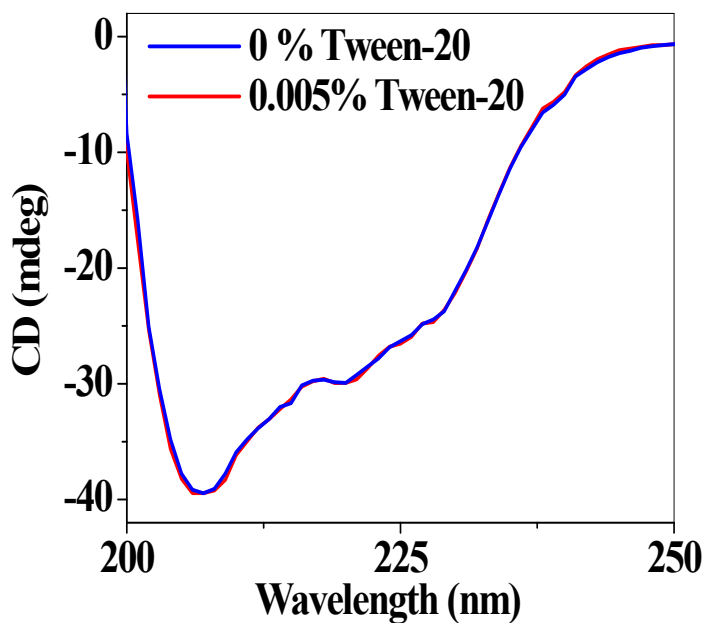

**Figure S1: CD spectra of lysozyme in phosphate buffer in 0% and 0.005% (w/w) Tween-20.**

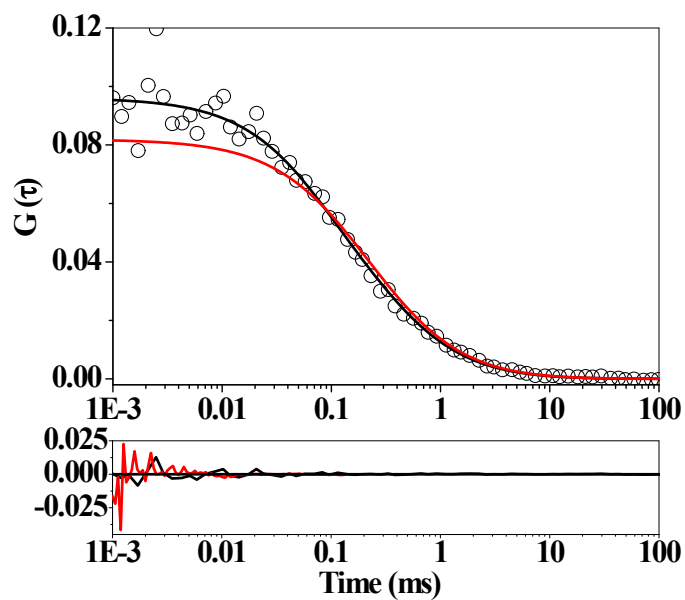

Figure S2: FCS trace of alexa-488 labeled lysozyme in phosphate buffer. Comparisons of fit to (a) free diffusion (red) and (b) one component diffusion and one component relaxation (black).

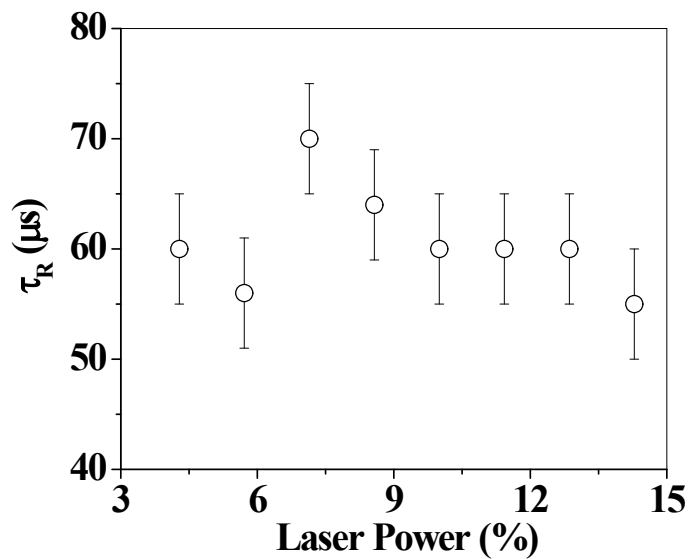

Figure S3: Variation of relaxation time ( $\tau_R$ ) of lysozyme with laser power.

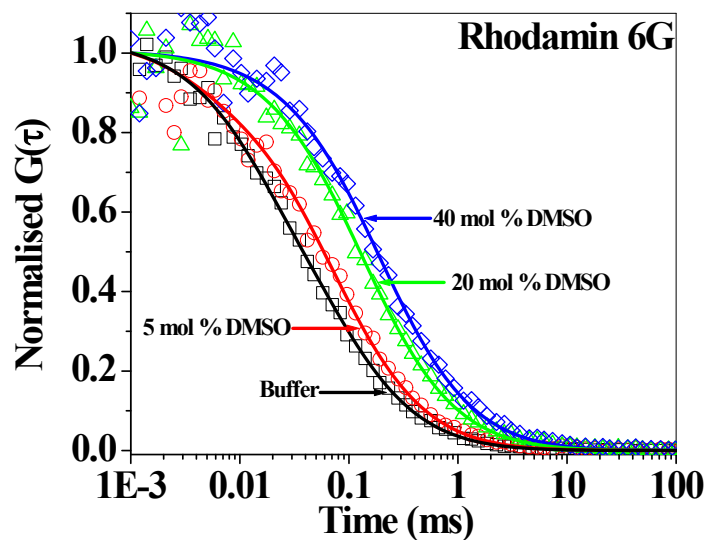

Figure S4. FCS traces of Rhodamin 6G in different mol % of DMSO-water mixture

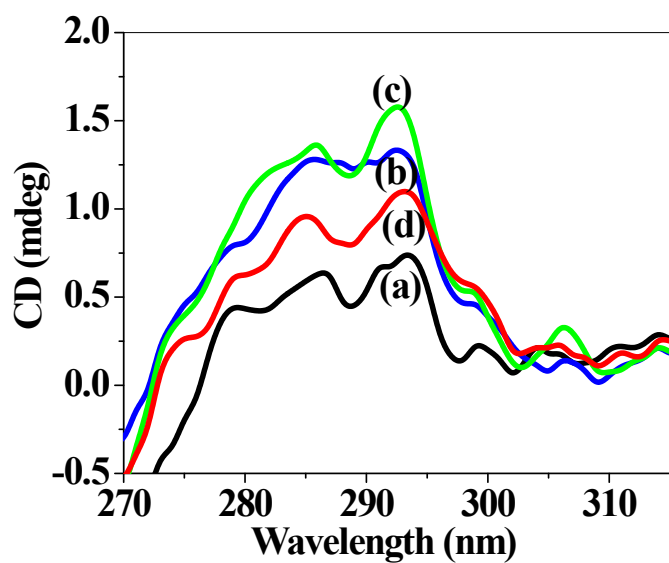

Figure S5: CD spectra of lysozyme in DMSO-water: (a) 0; (b) 5; (c) 20; and (d) 40 mol % DMSO.

**Table S1. pH and FCS data of lysozyme: Different mol % of DMSO**

| <b>Mol %<br/>DMSO</b> | <b>pH<sup>a</sup></b> | <b><math>\tau_D</math> (<math>\mu</math>s)<sup>b</sup></b> | <b><math>\tau_r</math> (<math>\mu</math>s)<sup>b</sup></b> | <b>F (%)</b> | <b><math>\tau_{R6G}</math><br/>(<math>\mu</math>s)</b> | <b><math>r_H</math> (<math>\text{\AA}</math>)<sup>c</sup></b> |
|-----------------------|-----------------------|------------------------------------------------------------|------------------------------------------------------------|--------------|--------------------------------------------------------|---------------------------------------------------------------|
| <b>0</b>              | <b>7.00</b>           | <b>220</b>                                                 | <b>65</b>                                                  | <b>19</b>    | <b>60</b>                                              | <b>18</b>                                                     |
| <b>1.31</b>           | <b>7.1</b>            | <b>265</b>                                                 | <b>85</b>                                                  | <b>24</b>    | <b>61</b>                                              | <b>22</b>                                                     |
| <b>2.74</b>           | <b>7.2</b>            | <b>350</b>                                                 | <b>105</b>                                                 | <b>34</b>    | <b>66</b>                                              | <b>27</b>                                                     |
| <b>5</b>              | <b>7.2</b>            | <b>465</b>                                                 | <b>150</b>                                                 | <b>34</b>    | <b>70</b>                                              | <b>33</b>                                                     |
| <b>10</b>             | <b>7.4</b>            | <b>480</b>                                                 | <b>125</b>                                                 | <b>32</b>    | <b>98</b>                                              | <b>25</b>                                                     |
| <b>15</b>             | <b>7.4</b>            | <b>470</b>                                                 | <b>105</b>                                                 | <b>20</b>    | <b>114</b>                                             | <b>21</b>                                                     |
| <b>20</b>             | <b>7.4</b>            | <b>510</b>                                                 | <b>60</b>                                                  | <b>19.5</b>  | <b>132</b>                                             | <b>20</b>                                                     |
| <b>30</b>             | <b>7.7</b>            | <b>620</b>                                                 | <b>40</b>                                                  | <b>16</b>    | <b>177</b>                                             | <b>18</b>                                                     |
| <b>40</b>             | <b>8.0</b>            | <b>770</b>                                                 | <b>60</b>                                                  | <b>19</b>    | <b>190</b>                                             | <b>20</b>                                                     |

<sup>a</sup> $\pm 0.1$ , <sup>b</sup> $\pm 10 \mu$ s, <sup>c</sup> $\pm 2 \text{\AA}$ .
